# Supplementary material for: Musculoskeletal modelling of an ostrich ( Struthio camelus ) pelvic limb: influence of limb orientation on muscular capacity during locomotion
Source: PeerJ journal article supplement (doi:10.7717/peerj.1001), 2015-06-11

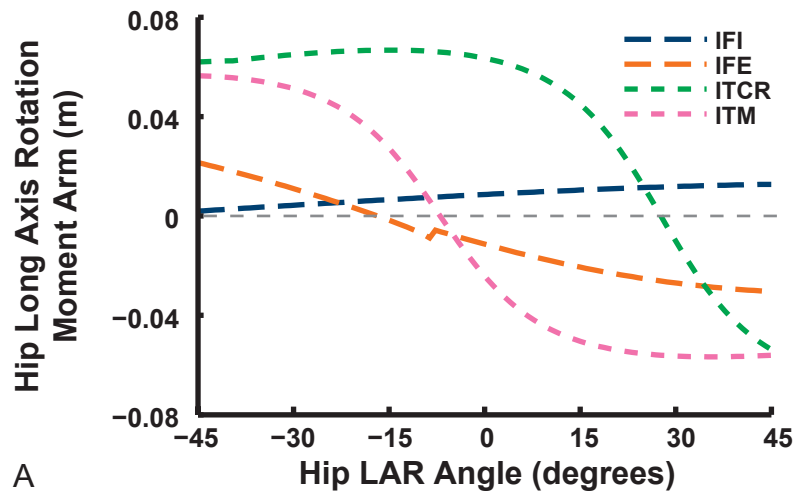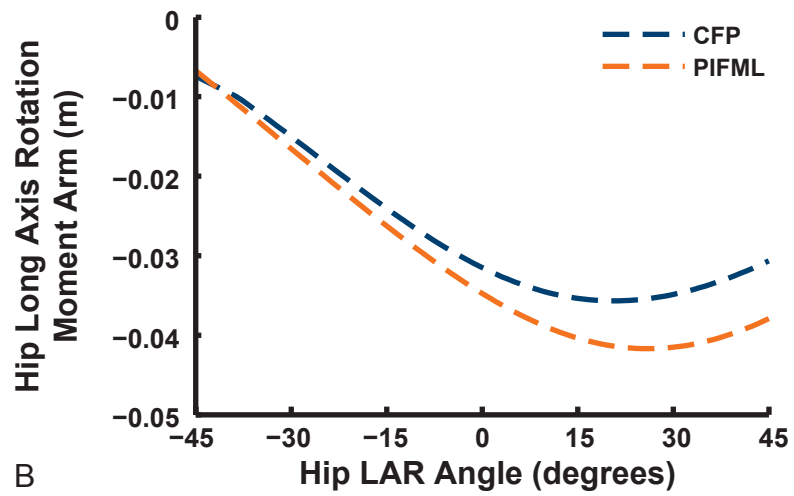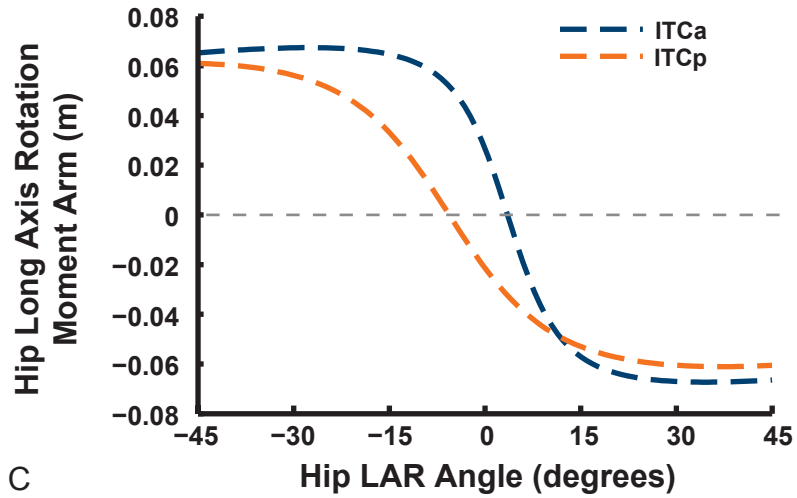

Supplement: FigS2_HipLAR_MAs2_(2).pdf [file FigS2_HipLAR_MAs2_(2).pdf]
